# Supplementary material for: Prognostic models for predicting in-hospital paediatric mortality in resource-limited countries: a systematic review
Source: HighWire-hosted journal article supplement (doi:10.1136/bmjopen-2019-035045), 2020-10-01
Supplement: bmjopen-2019-035045supp002_data_supplement.pdf [file bmjopen-2019-035045supp002_data_supplement.pdf]

| <b>Study</b>   | <b>Model name</b>     | <b>Country</b>                                                  | <b>Source of data</b>             | <b>Study year</b> | <b>Inclusion criteria</b>                                                  | <b>Age</b>             | <b>Outcome</b>                         |
|----------------|-----------------------|-----------------------------------------------------------------|-----------------------------------|-------------------|----------------------------------------------------------------------------|------------------------|----------------------------------------|
| Berkley 2003   | PEDIA Immediate death | Kenya                                                           | Prospective cohort                | 1998-2000         | Aged over 90 days                                                          | 3 months-13 years      | Mortality                              |
| Berkley 2003   | PEDIA Early death     | Kenya                                                           | Prospective cohort                | 1998-2000         | Aged over 90 days                                                          | 3 months-13 years      | Mortality                              |
| Berkley 2003   | PEDIA Late death      | Kenya                                                           | Prospective cohort                | 1998-2000         | Aged over 90 days                                                          | 3 months-13 years      | Mortality                              |
| Bitwe 2006     | Goma 1 Model          | Democratic Republic of Congo                                    | Prospective cohort                | 2003-2004         | <12 months                                                                 | Median: 12.8 months    | Mortality                              |
| Drainax 1996   |                       | Congo                                                           | Prospective cohort                | 1986-1988         | Malnutrition                                                               | Median: 27 months      | Mortality                              |
| Kumar 2003     | SICK score            | India                                                           | Prospective cohort                | 1998-1999         | Paediatric patients                                                        | No Information         | Mortality                              |
| Geoge 2015     | PET Score             | Kenya, Uganda, Tanzania                                         | RCT                               | 2009-2011         | Malaria                                                                    | Median: 24 (IQR=13-38) | Mortality                              |
| Emukule 2014   | mRISC                 | Kenya                                                           | Surveillance                      | 2009-2012         | Under 5 years hospitalized with severe acute respiratory illness           | <59 months             | Mortality                              |
| Reed 2012      | RISC-HIV positive     | South Africa                                                    | RCT                               | 1998-2001         | LRTI hospitalizations under 24 months with HIV infection                   | <24 months             | Mortality                              |
| Reed 2012      | RISC-HIV Negative     | South Africa                                                    | RCT                               | 1998-2001         | LRTI hospitalizations under 24 months without HIV infection                | <24 months             | Mortality                              |
| Hooli 2016     | RISC-Malawi           | Malawi                                                          | Retrospective observational study | 2011-2014         | 0-59 months hospitalized with pneumonia                                    | <59 months             | Mortality                              |
| Gallagher 2019 | PERCH Score           | Kenya, Zambia, South Africa, Mali, Gambia, Bangladesh, Thailand | Case-control study                | 2011-2014         | 1-59 months HIV negative hospitalized with severe or very severe pneumonia | Median: 9(4-19) months | In-hospital mortality and 7-days post- |

|                                   |                 |                                  |                                         |           |                                                        |                                    |                     |
|-----------------------------------|-----------------|----------------------------------|-----------------------------------------|-----------|--------------------------------------------------------|------------------------------------|---------------------|
|                                   |                 |                                  |                                         |           |                                                        |                                    | discharge mortality |
| Helbok 2009                       | LOD score       | Gambia,Malawi, Kenya,Ghana,Gabon | Prospective cohort                      | 2000-2005 | Hospitalized children with severe malaria              | 28(0-180)                          | Mortality           |
| Erdman 2011 (Logistic regression) | Biomarker score | Uganda                           | Retrospective nested case-control study | 2007-2009 | 6 months - 12 years                                    | 6 months - 12 years                | Mortality           |
| Erdman 2011 (Classification tree) |                 | Uganda                           | Retrospective nested case-control study | 2007-2009 | 6 months - 12 years                                    | 6 months - 12 years                | Mortality           |
| Lowlaavar 2016                    | Model 1         | Uganda                           | Prospective observational study         | 2012-2013 | 6–60 months admitted with infectious illness           | Median 18.2 (IQR 11.9–33.1) months | Mortality           |
| Lowlaavar 2016                    | Model 2         | Uganda                           | Prospective observational study         | 2012-2013 | 6–60 months admitted with infectious illness           | Median 18.2 (IQR 11.9–33.1) months | Mortality           |
| Lowlaavar 2016                    | Model 3         | Uganda                           | Prospective observational study         | 2012-2013 | 6–60 months admitted with infectious illness           | Median 18.2 (IQR 11.9–33.1) months | Mortality           |
| Mpimbaza 2015                     |                 | Uganda                           | Surveillance                            | 2010-2013 | General paediatrics                                    | 18 months (IQR 9–36)               | Mortality           |
| Olson 2013                        | ITAT score      | Malawi                           | Nested case–control                     | 2010-2011 | age <15 years on the acute care and malnutrition wards | ≤15 years                          | Mortality           |
| Rosman 2019                       | PEWS-RL         | Rwanda                           | Case-control study                      | 2016-2017 | 0-18 years patients admitted to pediatric department   | 0-18 years                         | Mortality           |

| <b>Study</b> | <b>Sample size</b> | <b>Number of outcome events</b> | <b>Missing data handling</b> | <b>Number of participants with missing data reported?</b> | <b>Regression method</b>         | <b>Were model assumptions verified</b> |
|--------------|--------------------|---------------------------------|------------------------------|-----------------------------------------------------------|----------------------------------|----------------------------------------|
| Berkley 2003 | 429                | 60                              | No Information               | No Information                                            | Spiegelhalter/Knill-Jones method | Yes                                    |

|                                   |       |      |                        |                |                                     |                |
|-----------------------------------|-------|------|------------------------|----------------|-------------------------------------|----------------|
| Berkley 2003                      | 439   | 193  | No Information         | No Information | Spiegelhalter/Knill-Jones method    | Yes            |
| Berkley 2003                      | 436   | 183  | No Information         | No Information | Spiegelhalter/Knill-Jones method    | Yes            |
| Bitwe 2006                        | 414   | 66   | No Information         | No Information | Logistic regression                 | Yes            |
| Drimax 1996                       | 1129  | 196  | No Information         | No Information | Logistic regression                 | No Information |
| Kumar 2003                        | 1099  | 44   | No Information         | No Information | Logistic regression                 | No Information |
| Geoge 2015                        | 3170  | 315  | Complete case analyses | Yes            | Cox proportional hazards regression | No Information |
| Emukule 2014                      | 3581  | 218  | Complete case analyses | No Information | Logistic regression                 | Yes            |
| Reed 2012                         | 1502  | 265  | Complete case analyses | No Information | Logistic regression                 | No Information |
| Reed 2012                         | 2646  | 33   | Complete case analyses | No Information | Logistic regression                 | No Information |
| Hooli 2016                        | 14665 | 464  | Multiple imputation    | Yes            | Logistic regression                 | Yes            |
| Gallagher 2019                    | 1802  | 120  | Complete case analyses | No Information | Logistic regression                 | No Information |
| Helbok 2009                       | 23980 | 1004 | Complete case analyses | Yes            | Logistic regression                 | No Information |
| Erdman 2011 (Logistic regression) | 103   | 23   | No missing values      | Yes            | Logistic regression                 | Yes            |
| Erdman 2011 (Classification tree) | 103   | 23   | No missing values      | Yes            | Classification tree                 | No Information |
| Lowlaavar 2016                    | 1307  | 65   | Multiple imputation    | No Information | Logistic regression                 | No Information |
| Lowlaavar 2016                    | 1307  | 65   | Multiple imputation    | No Information | Logistic regression                 | No Information |
| Lowlaavar 2016                    | 1307  | 65   | Multiple imputation    | No Information | Logistic regression                 | No Information |

|               |       |      |                        |                |                     |                |
|---------------|-------|------|------------------------|----------------|---------------------|----------------|
| Mpimbaza 2015 | 50249 | 1742 | Complete case analyses | Yes            | Logistic regression | No Information |
| Olson 2013    | 1606  | 54   | Single imputation      | Yes            | Logistic regression | Yes            |
| Rosman 2019   | 168   | 57   | Complete case analyses | No Information | Logistic regression | No Information |

| <b>Study</b>   | <b>Predictor selection</b>                             | <b>Was a shrinkage method used</b> | <b>Calibration method</b>    | <b>Discrimination</b>    |
|----------------|--------------------------------------------------------|------------------------------------|------------------------------|--------------------------|
| Berkley 2003   | Univariate                                             | No Information                     | No Information               | 0.93(0.92-0.94)          |
| Berkley 2003   | Univariate                                             | No Information                     | No Information               | 0.82(0.80-0.83)          |
| Berkley 2003   | Univariate                                             | No Information                     | No Information               | 0.82(0.81-0.84)          |
| Bitwe 2006     | Univariate & Stepwise                                  | No Information                     | Yes                          | 0.83 (0.78-0.88)         |
| Drimax 1996    | A priori                                               | No Information                     | No Information               | 0.85(No information)     |
| Kumar 2003     | Univariate( but included all variables in final model) | No Information                     | No Information               | 0.89                     |
| Geoge 2015     | A priori                                               | No Information                     | Hosmer-Lemeshow test, P=0.30 | 0.82(0.77–0.87)          |
| Emukule 2014   | Univariate                                             | Yes                                | Calibration plot             | 0.85                     |
| Reed 2012      | Univariate                                             | No Information                     | Hosmer-Lemeshow test, P=0.95 | 0.78                     |
| Reed 2012      | Univariate                                             | No Information                     | Hosmer-Lemeshow test, P=0.87 | 0.92                     |
| Hooli 2016     | A priori                                               | No Information                     | Risk predictiveness curve    | 0.79 (95% CI: 0.76±0.82) |
| Gallagher 2019 | Univariate                                             | No Information                     | Calibration plot             | 0.84(No Information)     |
| Helbok 2009    | Forward & backward Stepwise                            | No Information                     | No Information               | 80 (79–82)               |

|                                   |                       |                |                                                     |                          |
|-----------------------------------|-----------------------|----------------|-----------------------------------------------------|--------------------------|
| Erdman 2011 (Logistic regression) | Univariate            | No Information | Hosmer-Lemeshow test and calibration slope analysis | 0.96(0.90–0.99)          |
| Erdman 2011 (Classification tree) | No Information        | No Information | No Information                                      | No Information           |
| Lowlaavar 2016                    | Univariate & Stepwise | No Information | No Information                                      | 0.85 (0.80–0.89)         |
| Lowlaavar 2016                    | Univariate & Stepwise | No Information | No Information                                      | 0.84 (0.79–0.89)         |
| Lowlaavar 2016                    | Univariate & Stepwise | No Information | No Information                                      | 0.82 (0.72–0.91)         |
| Mpimbaza 2015                     | Backward              | No Information | General paediatrics                                 | 0.76(No information)     |
| Olson 2013                        | Univariate            | No Information | No Information                                      | 0.76(No information)     |
| Rosman 2019                       | Univariate            | No Information | No Information                                      | 0.96 (95% CI 0.93–0.99). |

| <b>Study</b> | <b>Classification measures reported</b>                                                                    | <b>Method used for internal validation</b> | <b>External validation</b> | <b>Was a simplified model presented</b> | <b>Were coefficients (including intercept) of the regression model presented</b> |
|--------------|------------------------------------------------------------------------------------------------------------|--------------------------------------------|----------------------------|-----------------------------------------|----------------------------------------------------------------------------------|
| Berkley 2003 | No Information                                                                                             | Separate dataset                           | Yes                        | Yes                                     | NA                                                                               |
| Berkley 2003 | No Information                                                                                             | Separate dataset                           | Yes                        | Yes                                     | NA                                                                               |
| Berkley 2003 | No Information                                                                                             | Separate dataset                           | Yes                        | Yes                                     | NA                                                                               |
| Bitwe 2006   | No Information                                                                                             | No Information                             | No                         | Yes                                     | No                                                                               |
| Drimax 1996  | Positive predictive values 40% and negative predictive value of 97.9%                                      | Separate dataset                           | No                         | Yes                                     | No                                                                               |
| Kumar 2003   | Maximum discrimination was observed at a score of 2.5 with a sensitivity of 84.1% and of specificity 82.2% | No Information                             | Yes                        | Yes                                     | No                                                                               |
| Geoge 2015   | No Information                                                                                             | Separate dataset                           | No                         | Yes                                     | No                                                                               |
| Emukule 2014 | A score of >6 has a sensitivity of 1.8% and specificity 99.9%                                              | Bootstrapping                              | Yes                        | Yes                                     | No                                                                               |
| Reed 2012    | Score of 7 has a sensitivity of 4% and specificity of 99%                                                  | Bootstrapping                              | No                         | Yes                                     | No                                                                               |

|                                   |                                                                                                |                                  |     |     |     |
|-----------------------------------|------------------------------------------------------------------------------------------------|----------------------------------|-----|-----|-----|
| Reed 2012                         | Score of 6 has a sensitivity: 16% Specificity: 99%                                             | Bootstrapping                    | Yes | Yes | No  |
| Hooli 2016                        | a score of 8 has sensitivity of 57% and specificity of 88%                                     | No Information                   | No  | Yes | Yes |
| Gallagher 2019                    | positive predictive value 23.6%, positive predictive value 95.8%                               | Bootstrapping & separate dataset | No  | Yes | No  |
| Helbok 2009                       | LODS $\geq 1$ , sensitivity was 85% and specificity was 63%                                    | No Information                   | Yes | Yes | No  |
| Erdman 2011 (Logistic regression) | sensitivity of 95.7% (95% CI: 78.1–99.9) and specificity of 88.8% (79.7–94.7) predicting death | Bootstrapping                    | No  | Yes | No  |
| Erdman 2011 (Classification tree) | 100% sensitivity and 92.5% specificity for predicting outcome                                  | 10-fold cross validation         | No  | No  | No  |
| Lowlaavar 2016                    | Sensitive: 0.83 (0.74–0.92), Specificity: 0.76 (0.73–0.78)                                     | No Information                   | No  | No  | Yes |
| Lowlaavar 2016                    | Sensitive: 0.80 (0.70–0.90), Specificity: 0.76 (0.74–0.79)                                     | No Information                   | No  | No  | Yes |
| Lowlaavar 2016                    | Sensitive: 0.82 (0.72–0.91), Specificity: 0.71 (0.68–0.73)                                     | No Information                   | No  | No  | Yes |
| Mpimbaza 2015                     | No Information                                                                                 | Separate dataset                 | No  | Yes | No  |
| Olson 2013                        | sensitivity: 0.44, specificity: 0.86, PPV: 0.18, NPV: 0.96 for a cut-off of 4                  | No Information                   | No  | Yes | No  |
| Rosman 2019                       | PEWS-RL of $\geq 3$ , sensitivity was 96.2%, and specificity was 87.3%                         | No Information                   | No  | Yes | No  |

| <b>Study</b> | <b>Number of predictors in final model</b> | <b>Predictors in the final model</b>                                                                        | <b>Are there laboratory-based predictors</b> | <b>Handling of continuous predictors</b> | <b>Events per variable</b> |
|--------------|--------------------------------------------|-------------------------------------------------------------------------------------------------------------|----------------------------------------------|------------------------------------------|----------------------------|
| Berkley 2003 | 10                                         | Severe anaemia, Jaundice, Subcostal indrawing, Deep breathing, prostrated with seizures, prostrated without | No                                           | NA                                       | 6                          |

|              |   |                                                                                                                                                                                                                                       |    |                                       |          |
|--------------|---|---------------------------------------------------------------------------------------------------------------------------------------------------------------------------------------------------------------------------------------|----|---------------------------------------|----------|
|              |   | seizures, Impaired consciousness with seizures, Impaired consciousness without seizures, Axillary temperature <36 °C, Axillary temperature >39 °C                                                                                     |    |                                       |          |
| Berkley 2003 | 8 | Jaundice, Subcostal indrawing, Prostrated with seizures, Prostrated without seizures, Impaired consciousness with seizures, Impaired consciousness without seizures, Wasting, Kwashiorkor                                             | No | NA                                    | 24.125   |
| Berkley 2003 | 9 | History >7 days, Prostrated with seizures, Prostrated without seizures, Impaired consciousness with seizures, Impaired consciousness without seizures, Axillary temperature <36 °C, Axillary temperature >39 °C, Wasting, Kwashiorkor | No | Dichotomized History                  | 20.33333 |
| Bitwe 2006   | 8 | Age(<12, >=12months), Brachial Perimeter(<=115mm, >115mm), State of consciousness(Unconscious, Aware), Infectious diagnosis(Acute respiratory infection, Malaria, Gastroenteritis, Septicemia / bacteremia, Other infections)         | No | Dichotomized Brachial perimeter & Age | 8.25     |

|              |    |                                                                                                                                                                                                                                                                                                          |     |                                      |          |
|--------------|----|----------------------------------------------------------------------------------------------------------------------------------------------------------------------------------------------------------------------------------------------------------------------------------------------------------|-----|--------------------------------------|----------|
| Drimax 1996  | 4  | MUAC, edema, Serum albumin, Transthyretin                                                                                                                                                                                                                                                                | Yes | MUAC                                 | 49       |
| Kumar 2003   | 9  | Temperature(Normal, Abnormal), Heart rate(Normal, Abnormal), Respiratory rate(Normal, Abnormal), Systolic blood pressure(Normal, Abnormal), Capillary refill time(Normal, Abnormal), Consciousness(Normal, Abnormal), Age( $\geq 60$ , $\geq 12$ to $< 60$ , $\geq 1$ to $< 12$ , $< 1$ )                | No  | Dichotomized most variables          | 4.888889 |
| Geoge 2015   | 11 | Temperature( $\leq 37$ , $> 37$ ), Heart rate( $< 80$ bpm, $\geq 80$ to $< 105$ bpm, $\geq 220$ bpm), Capillary refill time( $\geq 2$ sec, $< 2$ sec), Conscious level(prostrate, coma), Respiratory distress, Lung crepitations, Severe pallor, Weak pulse, Weight( $< 6$ kg, $6-8$ kg), Deep breathing | No  | multivariable fractional polynomials | 28.63636 |
| Emukule 2014 | 9  | Lab confirmed malaria, Weight for age(Low, Very Low), Dehydration, Unconscious, Unable to drink/breastfeed, Night sweats, Chest wall in-drawing, Interaction between malaria and chest wall in-drawing, A.V.P.U scale - Not alert                                                                        | Yes | Categorized weight for age           | 24.22222 |



|                |    |                                                                                                                                                                                                                                                                                                                |     |                                        |          |
|----------------|----|----------------------------------------------------------------------------------------------------------------------------------------------------------------------------------------------------------------------------------------------------------------------------------------------------------------|-----|----------------------------------------|----------|
| Reed 2012      | 7  | Oxygen saturation <90%, Chest indrawing, Wheezing, Refusing feeds, HIV classification(Severe, Mild or moderate), IMCI age group(<2 months, 3–12 months)                                                                                                                                                        | No  |                                        | 37.85714 |
| Reed 2012      | 5  | Oxygen saturation <90%, Chest indrawing, Wheezing, Refusing feeds, Weight for age(Low (<= -2 z-score), Very Low (<= -3 z-score))                                                                                                                                                                               | No  | Categorized weight for age             | 6.6      |
| Hooli 2016     | 5  | Oxygen saturation(moderate, severe), MUAC(moderate, severe), Gender, Wheeze, Consciousness                                                                                                                                                                                                                     | No  | Categorized MUAC and Oxygen saturation | 92.8     |
| Gallagher 2019 | 12 | Age(1-11, 12-59), sex, Unresponsiveness and/or deep breathing(Deep breathing, but alert, Unresponsive but no deep breathing, Unresponsive and deep breathing), cough, grunting, hypoxemia, length of illness(0–2, 3–5, >5), Weight-for-height z-score(Very low (< -3), Low (≥ -3 to < -2), Normal-high (≥ -2)) | No  | Categorized most variables             | 10       |
| Helbok 2009    | 8  | Convulsion, vomiting, deep breathing, intercostal recession, Coma,                                                                                                                                                                                                                                             | Yes | NA                                     | 125.5    |

|                                   |    |                                                                                                                                                                                                        |     |                       |          |
|-----------------------------------|----|--------------------------------------------------------------------------------------------------------------------------------------------------------------------------------------------------------|-----|-----------------------|----------|
|                                   |    | Prostration,hyperparastemia, severe anemia                                                                                                                                                             |     |                       |          |
| Erdman 2011 (Logistic regression) | 8  | angiopoietin-2, soluble ICAM-1, soluble Flt-1, procalcitonin, IP-10, soluble TREM-1, age, parasitemia                                                                                                  | Yes | NA                    | 2.875    |
| Erdman 2011 (Classification tree) | 3  | IP-10, Ang-2, sICAM-1                                                                                                                                                                                  | Yes | NA                    | 7.666667 |
| Lowlaavar 2016                    | 3  | Abnormal BCS, Positive HIV diagnosis, Weight-age z-score                                                                                                                                               | Yes | Treated as continuous | 21.66667 |
| Lowlaavar 2016                    | 3  | Abnormal BCS, HIV diagnosis, MUAC                                                                                                                                                                      | Yes | Treated as continuous | 21.66667 |
| Lowlaavar 2016                    | 2  | Abnormal BCS, MUAC                                                                                                                                                                                     | No  | Treated as continuous | 32.5     |
| Mpimbaza 2015                     | 13 | Age, fever, difficulty breathing, altered consciousness, unable to drink or breastfeed, convulsions, temperature, unconsciousness, pallor, jaundice, deep breathing, meningeal signs, unable to sit up | No  | NA                    | 134      |
| Olson 2013                        | 4  | Oxygen saturation, Temperature, Heart rate, Respiratory rate                                                                                                                                           | No  | Used splines          | 13.5     |
| Rosman 2019                       | 6  | PEWS-RL score(0 to 6)                                                                                                                                                                                  | No  | NA                    | 9.5      |
